# Supplementary material for: Analysis and Identification of Bioactive Compounds of Cannabinoids in Silico for Inhibition of SARS-CoV-2 and SARS-CoV
Source: MDPI journal article supplement (doi:10.3390/biom12121729), 2022-11-22
Supplement: s1 [file s1]

**Table S6** The ADMET profiling enlisting absorption, metabolism, and toxicity-related parameters of best selected molecules.

| Molecule      | Formula  | MW    | Log s | Abs  | BBB | Pgp-s | CYP1A2 | CYP2C19 | CYP2C9 | CYP2D6 | CYP3A4 | Bio  | AOT | CL    | T1/2  | hERG blocker | Oral acute toxicity | Bioconcentration factors |
|---------------|----------|-------|-------|------|-----|-------|--------|---------|--------|--------|--------|------|-----|-------|-------|--------------|---------------------|--------------------------|
| Luteolin      | C15H10O6 | 286.2 | -3.71 | High | No  | No    | Yes    | No      | No     | Yes    | Yes    | 0.55 | -   | 8.146 | 0.898 | NO           | NO                  | 1.016                    |
| CBNA          | C22H26O4 | 354.4 | -5.95 | High | No  | No    | Yes    | Yes     | Yes    | No     | No     | 0.85 | -   | 1.072 | 0.164 | NO           | NO                  | 0.426                    |
| Stigamasterol | C29H48O  | 412.6 | -7.46 | Low  | No  | No    | No     | No      | Yes    | No     | No     | 0.55 | -   | 4.515 | 0.036 | NO           | NO                  | 3.047                    |
