# Supplementary material for: Analysis and Identification of Bioactive Compounds of Cannabinoids in Silico for Inhibition of SARS-CoV-2 and SARS-CoV
Source: MDPI journal article supplement (doi:10.3390/biom12121729), 2022-11-22
Supplement: s1 [file s1]

**Table S4** MMPBSA based on total binding free energies along with its constituent energies for top three bioactive molecules.

| Protein | Complex      | Total Binding | Van der Waals | Electrostatic | Polar Solvation | SASA Energy |
|---------|--------------|---------------|---------------|---------------|-----------------|-------------|
|         |              | Free Energy   | Energy        | Energy        | Energy          | (Kcal/mol)  |
|         |              | (Kcal/mol)    | (Kcal/mol)    | (Kcal/mol)    | (Kcal/mol)      |             |
| 6M17    | Luteolin     | -20.7415      | -24.6780      | -15.8804      | 23.1922         | -3.3753     |
| 6M17    | CBGVA        | -22.9144      | -26.5570      | -18.3969      | 25.5149         | -3.4755     |
| 6M17    | CBNA         | -10.9932      | -15.0076      | -7.6496       | 13.7080         | -2.0440     |
| 3R4D    | Luteolin     | -12.7945      | -18.2797      | -22.3411      | 30.6544         | -2.8280     |
| 3R4D    | Stigmasterol | -28.0828      | -35.6418      | -6.9927       | 18.7811         | -4.2294     |
| 3R4D    | CBNA         | -17.0425      | -18.6689      | -22.9830      | 27.2120         | -2.6027     |
