# Supplementary material for: Analysis and Identification of Bioactive Compounds of Cannabinoids in Silico for Inhibition of SARS-CoV-2 and SARS-CoV
Source: MDPI journal article supplement (doi:10.3390/biom12121729), 2022-11-22
Supplement: s1 [file s1]

**Table S3** The number of clusters formed for a protein-ligand complex, their average RMSD and the energy of matrix.

| Protein | Complex      | Number of clusters | Average RMSD | Energy of matrix |
|---------|--------------|--------------------|--------------|------------------|
| 6M17    | Luteolin     | 32                 | 0.141506     | 5.66384          |
| 6M17    | CBGVA        | 31                 | 0.139141     | 5.54774          |
| 6M17    | CBNA         | 8                  | 0.102055     | 5.14521          |
| 3R4D    | Luteolin     | 19                 | 0.129989     | 4.76544          |
| 3R4D    | Stigmasterol | 10                 | 0.113522     | 4.49758          |
| 3R4D    | CBNA         | 10                 | 0.112141     | 4.58328          |
